# Supplementary material for: A Preliminary Assessment of the Impacts of Multiple Temporal-scale Variations in Particulate Matter on its Source Apportionment
Source: Copernicus journal article supplement (doi:10.5194/acp-2017-997), 2018-03-07
Supplement: Supplementary file 1 [file acp-2017-997-supplement.pdf]

1        **A Preliminary Assessment of the Impacts of**  
2        **Multiple Temporal-scale Variations in Particulate**  
3        **Matter on its Source Apportionment**

4  
5        Xing Peng<sup>1</sup>, Jian Gao<sup>2</sup>, Guoliang Shi<sup>1\*</sup>, Xurong Shi<sup>1</sup>, Yanqi Huangfu<sup>1</sup>, Jiayuan Liu<sup>1</sup>, YueChong  
6        Zhang<sup>2</sup>, Yinchang Feng<sup>1\*\*</sup>, Wei Wang<sup>3</sup>, Ruoyu Ma<sup>3</sup>, Cesunica E. Ivey<sup>4</sup>, Yi Deng<sup>5</sup>

7  
8  
9        <sup>1</sup>State Environmental Protection Key Laboratory of Urban Ambient Air Particulate  
10        Matter Pollution Prevention and Control & Center for Urban Transport Emission  
11        Research, College of Environmental Science and Engineering, Nankai University,  
12        Tianjin 300350, China,

13        <sup>2</sup> Chinese Research Academy of Environmental Sciences, Beijing 100012, China,

14        <sup>3</sup> College of Software, Nankai University, Tianjin 300350, China,

15        <sup>4</sup>Department of Physics, University of Nevada Reno, Reno, Nevada, USA 89557,

16        <sup>5</sup>Earth and Atmospheric Sciences, Georgia Institute of Technology, Atlanta, GA 30332

17

18        **Correspondence to:**

19        **G.L. Shi, and Y.C. Feng,**

20        **nksgl@nankai.edu.cn;**

21        **fengyc@nankai.edu.cn**

22

23 *Evaluating the SOC*

24 Secondary organic carbon (SOC) concentrations were estimated using the OC/EC  
25 ratio, as follows:

$$26 \quad OC_{pri} = EC \times (OC/EC)_{pri} \quad (S1)$$

$$27 \quad SOC = OC_t - EC \times (OC/EC)_{min} \quad (S2)$$

28 where  $OC_{pri}$  is primary OC,  $OC_t$  is total OC, and  $(OC/EC)_{pri}$  is the OC/EC ratio of  
29 primary aerosol. Because  $(OC/EC)_{pri}$  is difficult to estimate, it was replaced by the  
30 minimum ratio of OC/EC ( $(OC/EC)_{min}$ ), according to the suggestion proposed by  
31 Castro et al. (1999).

32

33 **Figures**

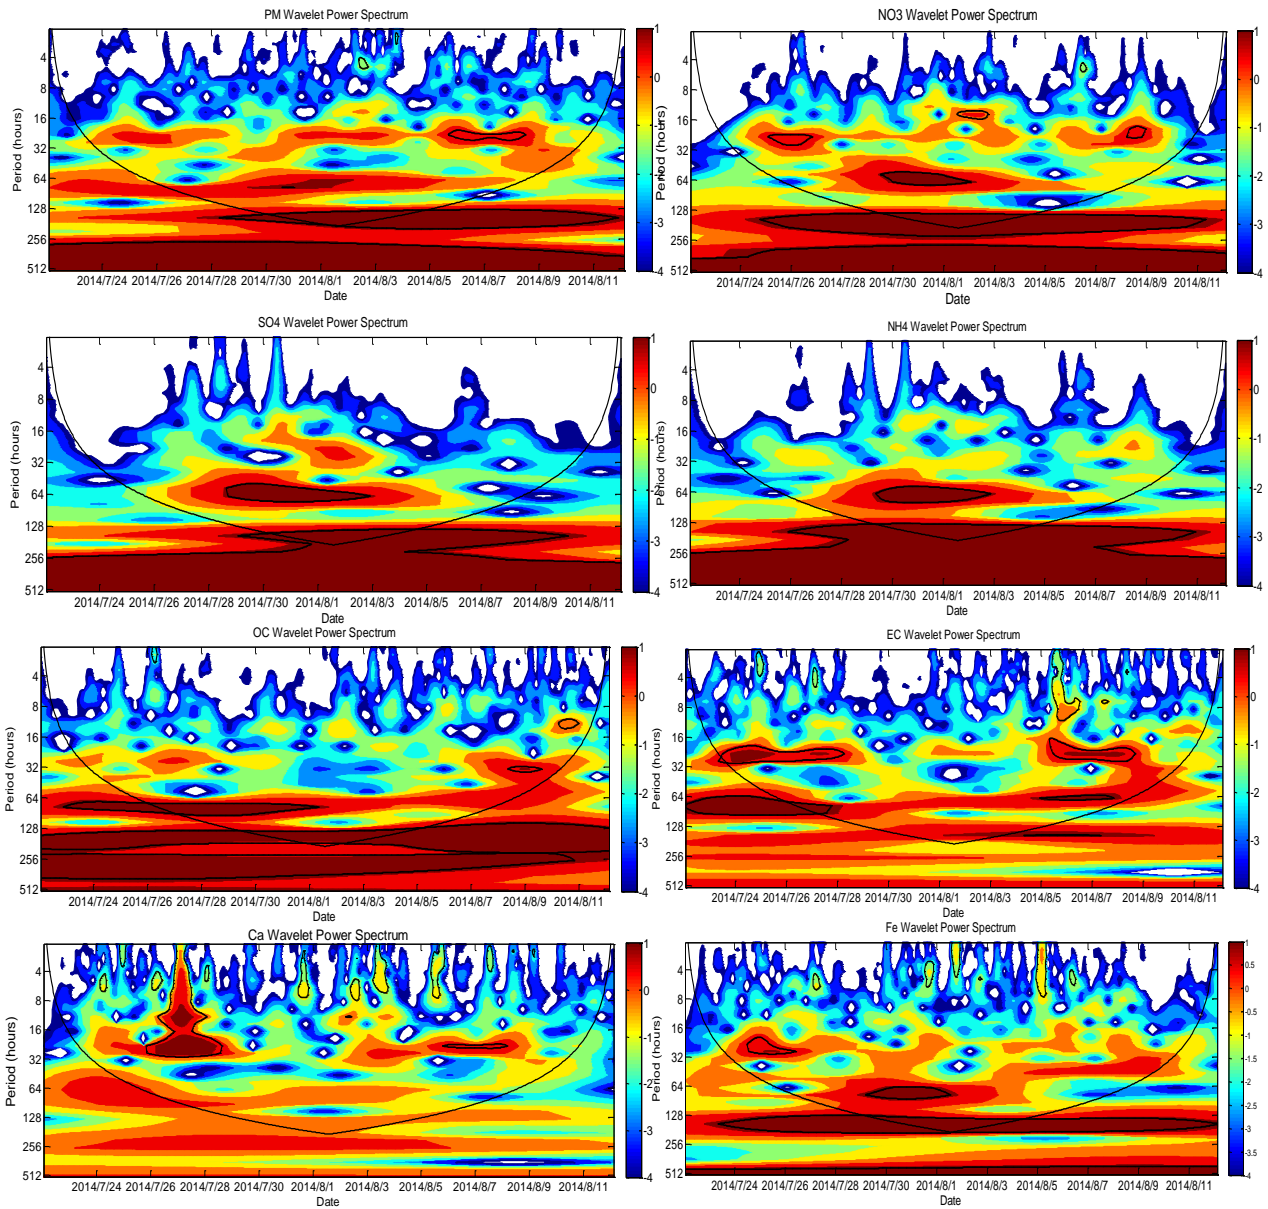

34

35 **Figure S1.** The wavelet variance diagrams of PM<sub>2.5</sub> and chemical species from original data.

36

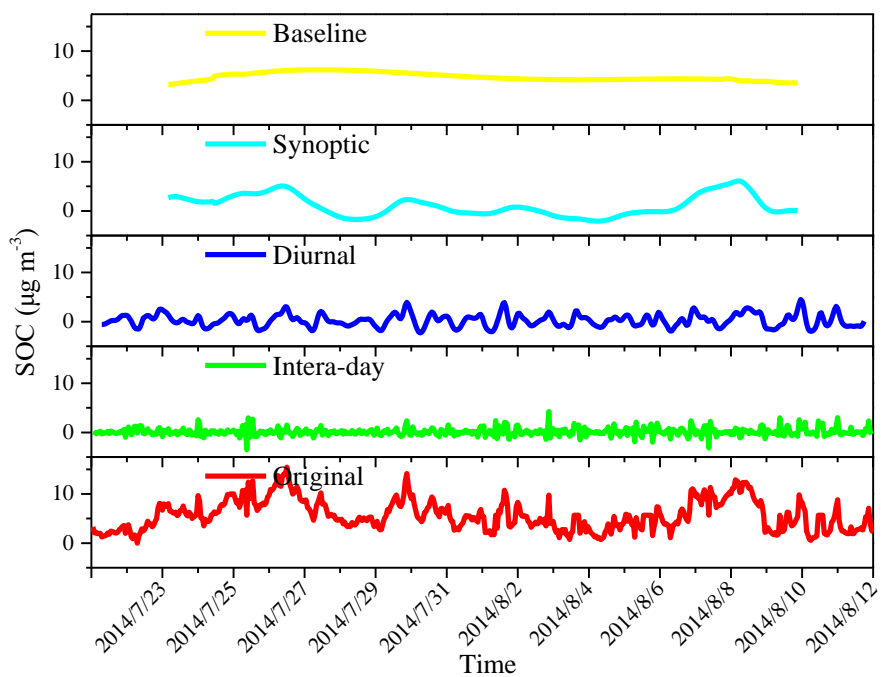

37  
38  
39  
40  
41

**Figure S2.** Variance and level of SOC concentrations influenced by intra-day (time period less than 12 h), diurnal (12-24 h), synoptic (2-21 days), and baseline (greater than 21 days) temporal-scale (TS) components, for the period of 22 July 2014 to 13 Aug 2014 at Beijing, China.

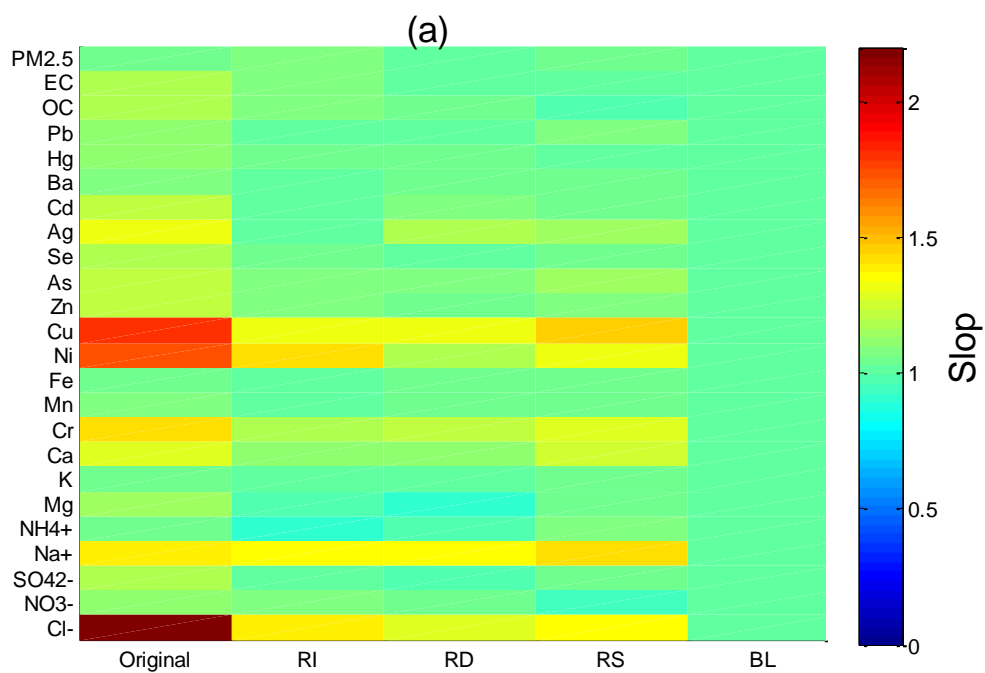

42

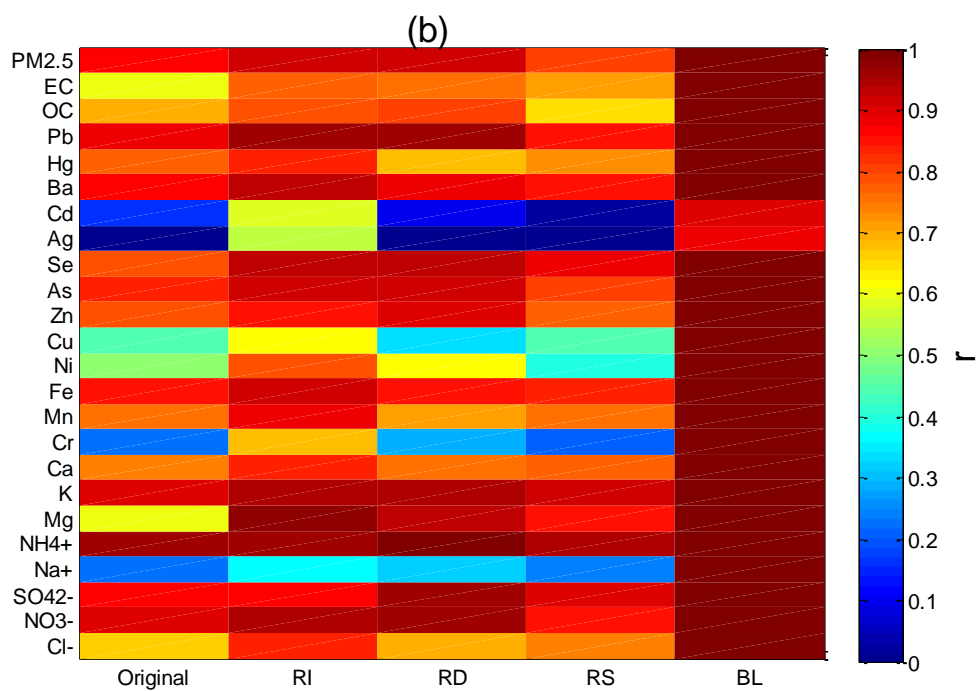

43

44 **Figure S3.** The performance of ME-2 from five datasets. (a): the slopes between model and measured  
 45 concentrations of chemical species and PM<sub>2.5</sub>. (RI: intra-day removed dataset, RD: diurnal removed  
 46 dataset, RS: synoptic removed dataset, RBL: baseline removed dataset) (b)The correlation  
 47 coefficients between modeled and measured concentrations of chemical species and PM<sub>2.5</sub>.

48

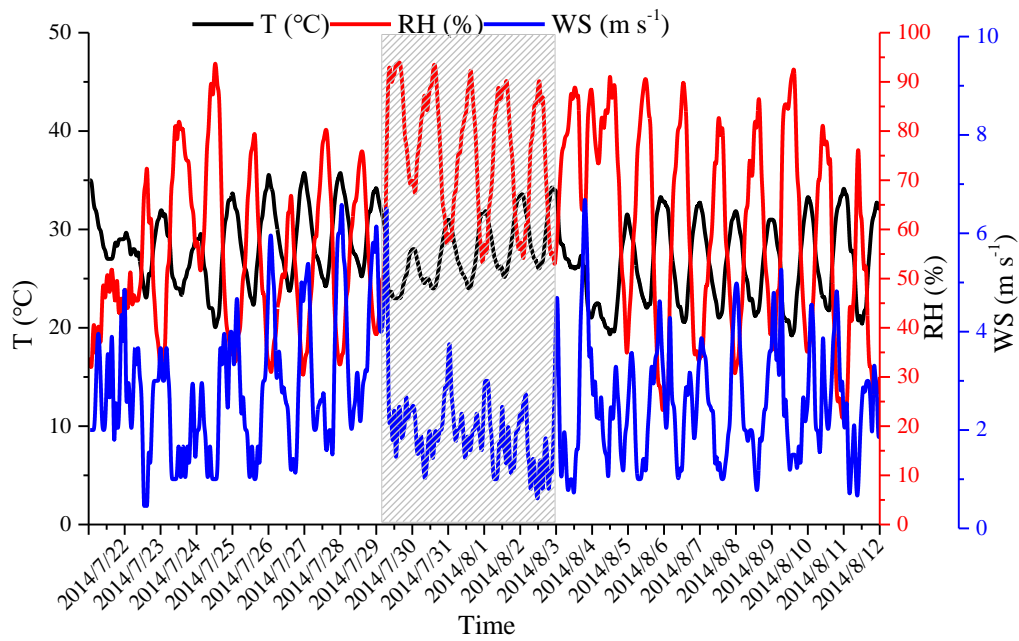

49

50 **Figure S4.** Time series of the temperature, RH and wind speed. The vertical gray lines demarcate  
51 the heavy pollution period.

52

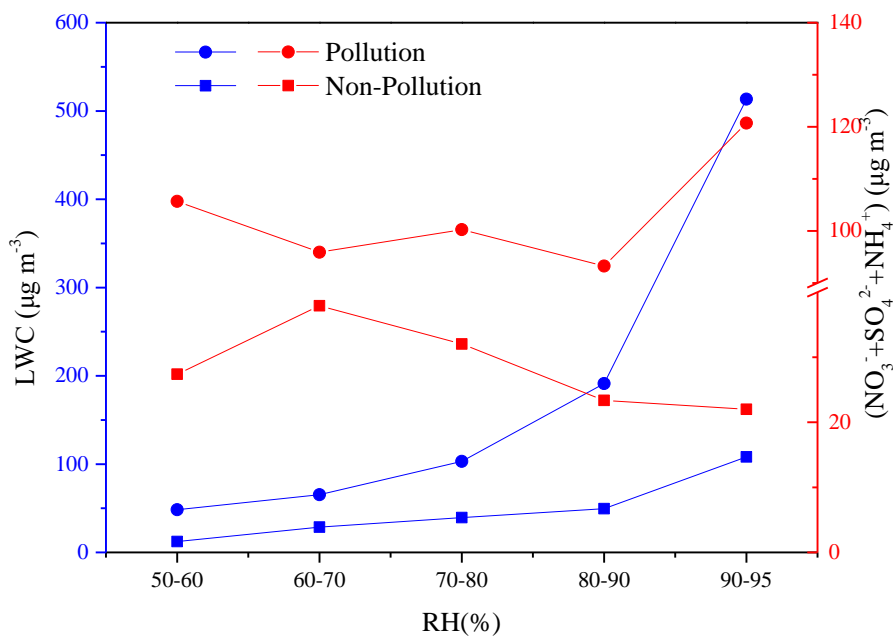

53

54 **Figure S5.** The total ions ( $\text{NO}_3^- + \text{SO}_4^{2-} + \text{NH}_4^+$ ) and LWC concentrations depend on RH during the  
 55 pollution and non-pollution periods.

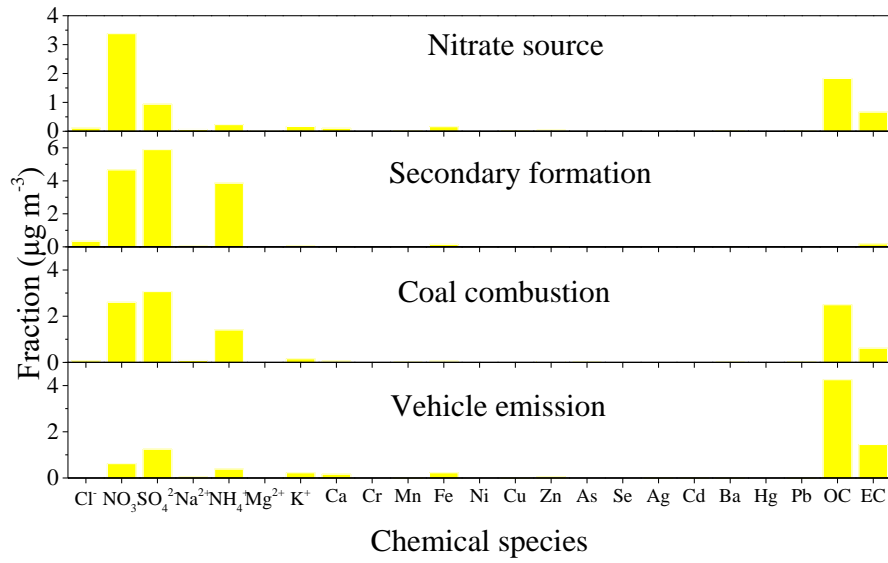

56

57

**Figure S6.** The factor profiles obtained from ME-2 from baseline dataset.



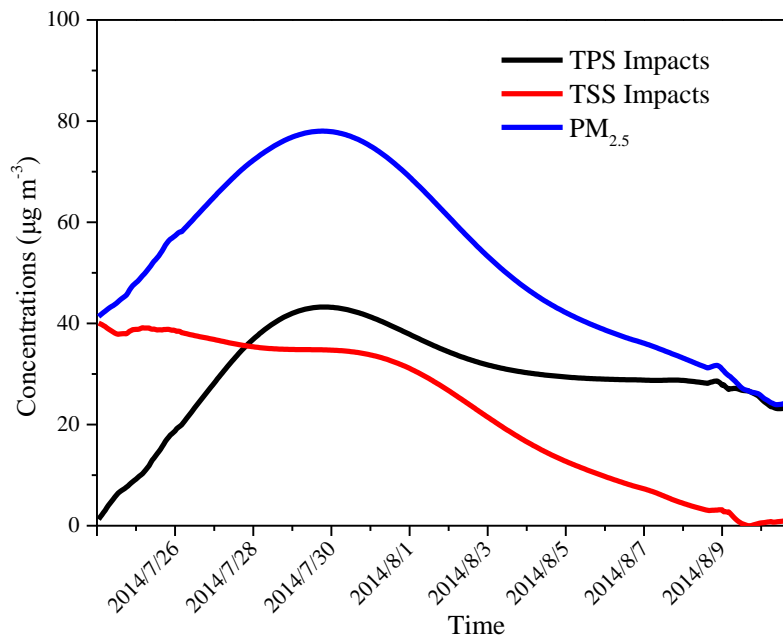

58

59 **Figure S7.** TPS, TSS impacts and PM<sub>2.5</sub> concentration from baseline dataset. (TPS: the total  
 60 contributions of vehicle emission and coal combustion. TSS: the total contributions of secondary  
 61 formation and nitrate source).

62 **Tables**63 **Table S1.** Average absolute error (AAE) between original and RI, RD, RS, and RBL for PM<sub>2.5</sub>,  
64 seven species and SOC.

|                              | RI <sup>a</sup> | RD <sup>b</sup> | RS <sup>c</sup> | RBL <sup>d</sup> |
|------------------------------|-----------------|-----------------|-----------------|------------------|
| PM <sub>2.5</sub>            | 18              | 40              | 63              | 149              |
| OC                           | 8               | 15              | 23              | 100              |
| EC                           | 10              | 20              | 20              | 106              |
| NO <sub>3</sub> <sup>-</sup> | 12              | 57              | 77              | 149              |
| SO <sub>4</sub> <sup>+</sup> | 7               | 30              | 79              | 127              |
| NH <sub>4</sub> <sup>+</sup> | 9               | 41              | 108             | 148              |
| Ca                           | 20              | 38              | 24              | 124              |
| Fe                           | 12              | 30              | 31              | 116              |
| SOC                          | 11              | 21              | 31              | 102              |

65 <sup>a</sup>RI: intra-day removed dataset. <sup>b</sup>RD: diurnal removed dataset. <sup>c</sup>RS: synoptic removed dataset.66 <sup>d</sup>RBL: baseline removed dataset.

67 **Table S2.** Correlation coefficients between original and RI, RD, RS, and RBL for PM<sub>2.5</sub>, seven  
 68 species and SOC.

|                              | RI            | RD            | RS            | RBL           |
|------------------------------|---------------|---------------|---------------|---------------|
| PM <sub>2.5</sub>            | 0.96**        | 0.85**        | 0.88**        | 0.49**        |
| NO <sub>3</sub> <sup>-</sup> | 0.98**        | 0.86**        | 0.88**        | 0.51**        |
| SO <sub>4</sub> <sup>+</sup> | 0.99**        | 0.95**        | 0.88**        | 0.73**        |
| NH <sub>4</sub> <sup>+</sup> | 0.99**        | 0.95**        | 0.85**        | 0.69**        |
| OC                           | 0.97**        | 0.92**        | 0.77**        | 0.31**        |
| EC                           | 0.94**        | 0.84**        | 0.90**        | 0.19**        |
| Ca                           | 0.88**        | 0.88**        | 0.97**        | 0.26**        |
| Fe                           | 0.92**        | 0.87**        | 0.86**        | 0.34**        |
| SOC                          | <b>0.96**</b> | <b>0.92**</b> | <b>0.72**</b> | <b>0.30**</b> |

69 \*\* Significant correlation at 0.01 level.

70

71 **Table S3.** The Q values of each solution obtained by ME-2.

|          | Q     | Q <sub>the</sub> |
|----------|-------|------------------|
| Original | 12593 | 9940             |
| RI       | 10732 | 9353             |
| RD       | 9873  | 9712             |
| RS       | 10847 | 8002             |

72

**Table S4.** The results obtained from PCA from RBL dataset.

| Components                    | Factor 1    | Factor 2    | Factor 3    | Factor 4    | Factor 5    | Factor 6    | Factor 7    |
|-------------------------------|-------------|-------------|-------------|-------------|-------------|-------------|-------------|
| Cl <sup>-</sup>               | 0.09        | 0.12        | 0.41        | <b>0.67</b> | 0.30        | 0.02        | -0.04       |
| NO <sub>3</sub> <sup>-</sup>  | 0.13        | 0.23        | <b>0.80</b> | 0.33        | 0.17        | 0.04        | -0.08       |
| SO <sub>4</sub> <sup>2-</sup> | 0.22        | 0.03        | <b>0.86</b> | -0.01       | -0.03       | 0.04        | 0.14        |
| Na <sup>+</sup>               | -0.01       | 0.00        | 0.07        | -0.01       | 0.01        | 0.02        | <b>0.93</b> |
| NH <sub>4</sub> <sup>+</sup>  | 0.18        | 0.12        | <b>0.92</b> | 0.22        | 0.12        | 0.05        | 0.05        |
| Mg <sup>2+</sup>              | 0.22        | 0.30        | 0.14        | 0.52        | 0.02        | -0.06       | 0.33        |
| K                             | <b>0.87</b> | 0.38        | 0.06        | 0.00        | -0.09       | -0.05       | 0.00        |
| Ca                            | 0.18        | <b>0.83</b> | -0.05       | 0.17        | -0.11       | 0.00        | 0.11        |
| Cr                            | -0.03       | 0.08        | 0.02        | 0.04        | <b>0.92</b> | -0.04       | 0.03        |
| Mn                            | 0.57        | 0.58        | 0.19        | 0.05        | 0.16        | -0.09       | -0.10       |
| Fe                            | 0.52        | 0.58        | 0.31        | 0.14        | 0.40        | -0.05       | -0.09       |
| Ni                            | -0.15       | -0.01       | 0.16        | 0.13        | <b>0.91</b> | 0.04        | -0.01       |
| Cu                            | 0.17        | 0.12        | 0.15        | <b>0.76</b> | 0.12        | 0.03        | 0.01        |
| Zn                            | 0.67        | 0.16        | 0.16        | 0.39        | -0.18       | -0.02       | 0.18        |
| As                            | <b>0.79</b> | 0.12        | 0.02        | 0.37        | -0.11       | 0.00        | 0.00        |
| Se                            | <b>0.85</b> | 0.11        | 0.38        | -0.05       | -0.06       | -0.07       | -0.02       |
| Ag                            | -0.06       | -0.03       | 0.03        | 0.00        | 0.02        | <b>0.97</b> | -0.01       |
| Cd                            | -0.02       | -0.01       | 0.07        | 0.04        | -0.02       | <b>0.97</b> | 0.02        |
| Ba                            | 0.19        | <b>0.87</b> | 0.22        | 0.21        | 0.15        | 0.00        | 0.03        |
| Hg                            | 0.37        | 0.54        | 0.28        | 0.33        | 0.08        | -0.11       | -0.03       |
| Pb                            | <b>0.86</b> | 0.15        | 0.18        | 0.31        | 0.06        | 0.02        | 0.01        |
| OC                            | 0.44        | 0.35        | -0.03       | 0.56        | -0.09       | 0.04        | -0.14       |
| EC                            | 0.15        | 0.58        | 0.05        | 0.59        | -0.03       | 0.10        | -0.09       |
| Variance contribution (%)     | 19.60       | 14.25       | 12.70       | 11.91       | 9.18        | 8.45        | 4.82        |

75 **Table S5.** Correlation coefficients (426 samples) between original and intra-day removed dataset,  
 76 diurnal removed dataset, synoptic removed dataset for source contributions.

|                             | RI            | RD            | RS            |
|-----------------------------|---------------|---------------|---------------|
| Crustal dust <sup>a</sup>   | <b>0.68**</b> | -             | -             |
| Vehicle emission            | <b>0.45**</b> | 0.51**        | 0.25**        |
| Coal combustion             | 0.82**        | <b>0.77**</b> | 0.74**        |
| Secondary formation         | 0.96**        | 0.91**        | <b>0.53**</b> |
| Nitrate source <sup>b</sup> | -             | 0.63**        | 0.32**        |

77 <sup>a</sup>Only ME-2 from original and RI datasets identified the crustal dust. <sup>b</sup>ME-2 from original dataset  
 78 did not identify the correlation coefficients between RI and RD, and RS for the nitrate sources.

79 \*\*Significant correlation at 0.01 level.

80

81 **References**

82 Castro, L. M., Pio, C. A., Harrison, R. M., and Smith, D. J. T.: Carbonaceous aerosol in  
83 urban and rural European atmospheres: estimation of secondary organic carbon  
84 concentrations. *Atmos. Environ.*, 33, 2771-2781, doi: 10.1016/S1352-  
85 2310(98)00331-8, 1999.

86
